# Supplementary material for: Epidemiology of Chronic Obstructive Pulmonary Disease (COPD) Comorbidities in Lithuanian National Database: A Cluster Analysis
Source: MDPI journal article supplement (doi:10.3390/ijerph19020970), 2022-01-15
Supplement: s1 [file s1]

**Table S1.** The list of chronic diseases associated with ICD-10-AM.

---

|    |                                                                                              |
|----|----------------------------------------------------------------------------------------------|
| 2  | Anaemia D50                                                                                  |
| 3  | Hypothyrosis E02; E03; E89.0                                                                 |
| 4  | Diabetes E10.0-E10.9; E11.0-E11.9                                                            |
| 5  | Obesity E66                                                                                  |
| 6  | Dyslipidaemia E78                                                                            |
| 7  | Dementia F00.0-F00.9; G30.0-G30.9; F01.0-F01.9; F02.0-F02.8; F03                             |
| 8  | Mental disorders F20.0-F20.9; F30.0-F39; F40.00-F40.9; F41.0-F41.9; F42.0-F42.9; F43.0-F43.9 |
| 9  | Parkinson's disease G20                                                                      |
| 10 | Multiple sclerosis G35                                                                       |
| 11 | Epilepsy G40.00-G40.91                                                                       |
| 12 | Sleep apnoea G47.3                                                                           |
| 13 | Back pain G54.1; G54.4; G55.1; M51                                                           |
| 14 | Glaucoma H40-H42                                                                             |
| 15 | Blindness H53-H54                                                                            |
| 16 | Hearing loss H90.0-H90.8; H91.0-H91.9                                                        |
| 17 | Hypertension I10-I15                                                                         |
| 18 | Ischaemic heart disease I20-I25                                                              |
| 19 | Arrhythmias I44-I49                                                                          |
| 20 | Heart failure I50.0-I50.9                                                                    |
| 21 | Intracranial bleeding I61-I62                                                                |
| 22 | Stroke I63-I64; I69                                                                          |
| 23 | Chronic obstructive pulmonary disease J44.0-J44.9; J96                                       |
| 24 | Asthma J45.0-J45.9                                                                           |
| 25 | Inflammatory bowel disease K50; K51                                                          |
| 26 | Psoriasis L40.0-L40.9                                                                        |
| 27 | Rheumatoid arthritis M05-M06                                                                 |
| 28 | Gout M10.0-M10.99                                                                            |
| 29 | Osteoarthritis M15-M19                                                                       |
| 30 | Systemic lupus erythematosus M32                                                             |
| 31 | Osteoporosis M80-M82                                                                         |
| 32 | Renal failure N18-N19                                                                        |

---

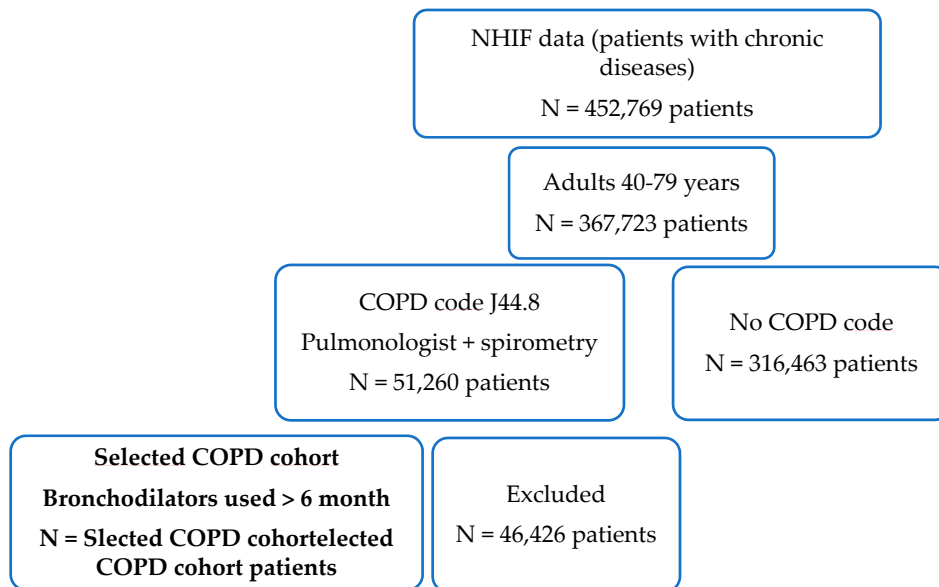

**Chart S1:** The flow diagram summarizing the process of enrolment.

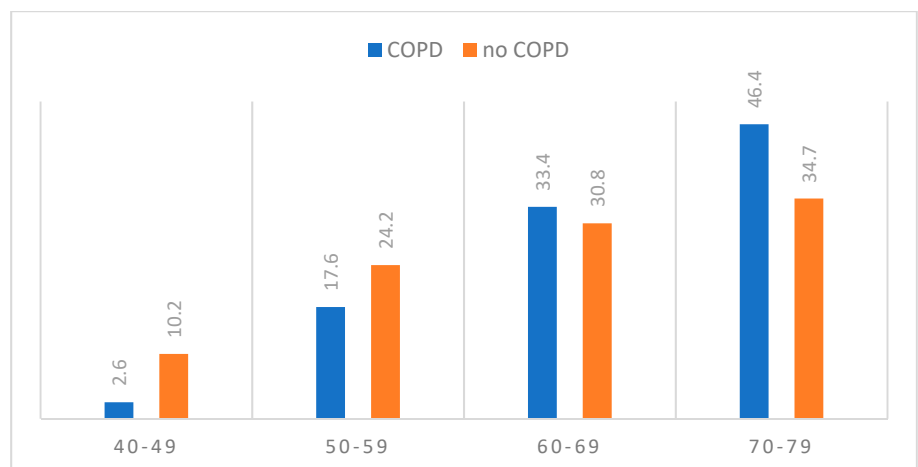

**Chart S2:** Distribution according to age.

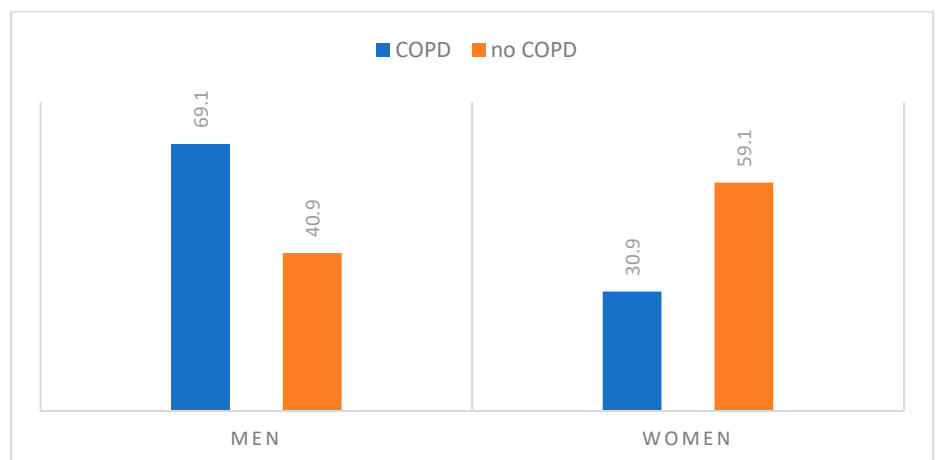

**Chart S3:** Distribution according to sex.

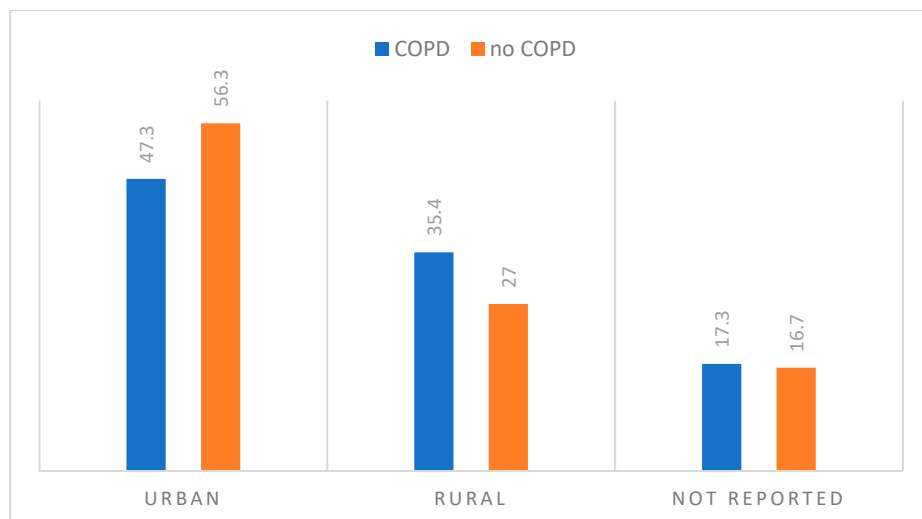

**Chart S4:** Distribution according to the place of residence.

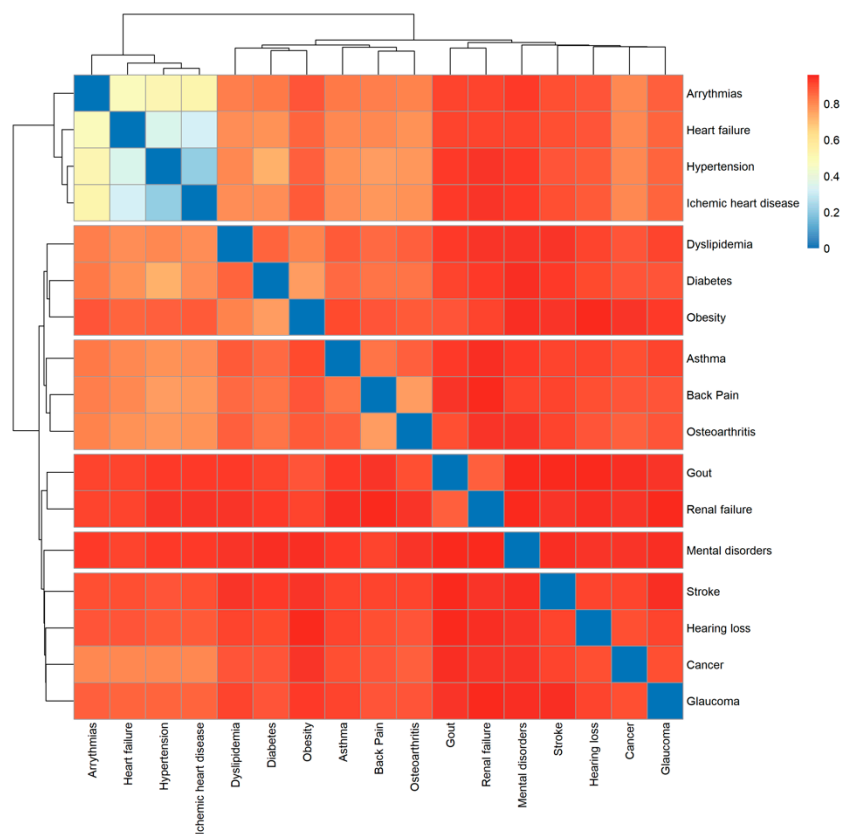

**Figure S1.** Multimorbidity clusters (COPD group-males).

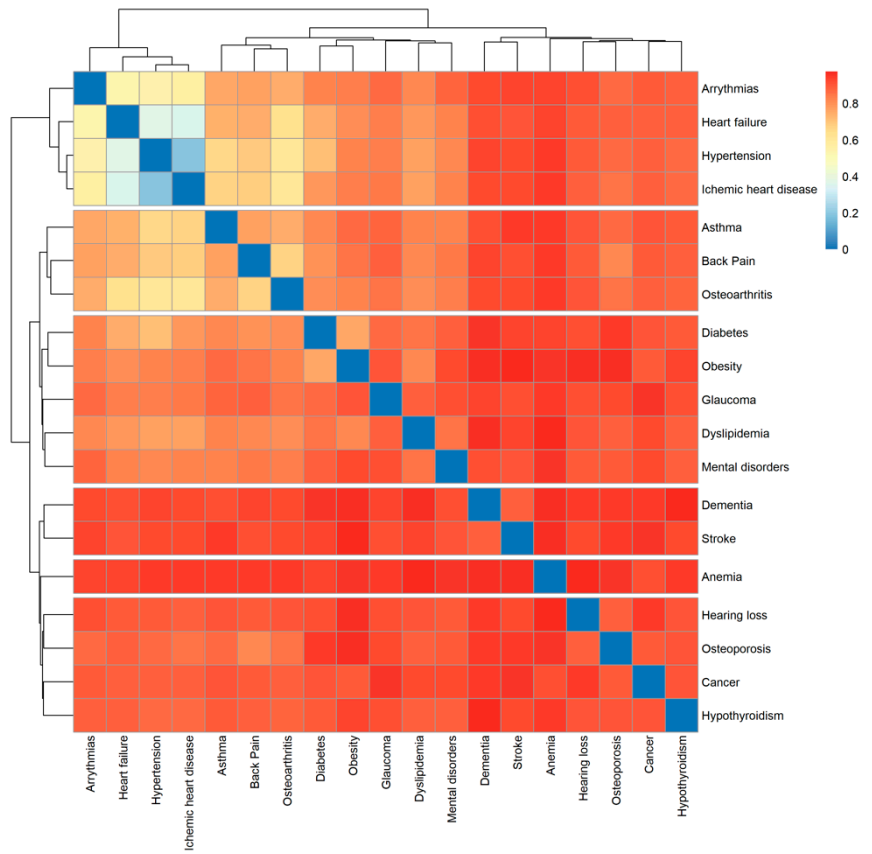

**Figure S2.** Multimorbidity clusters (COPD group-females).

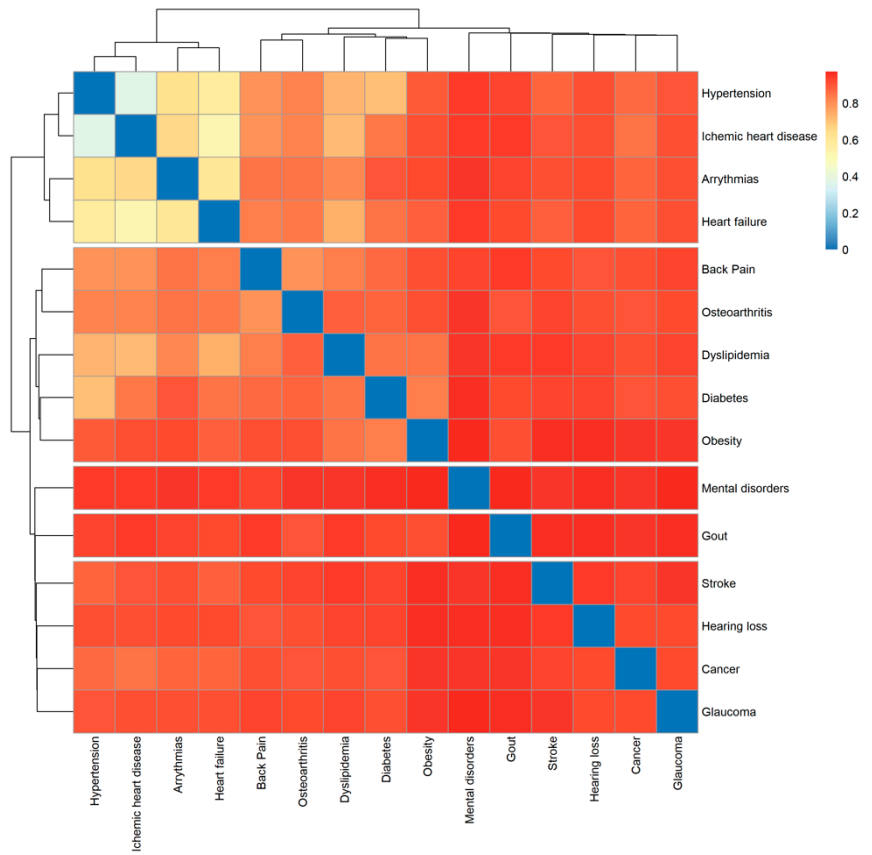

**Figure S3:** Multimorbidity clusters (no COPD group-males).

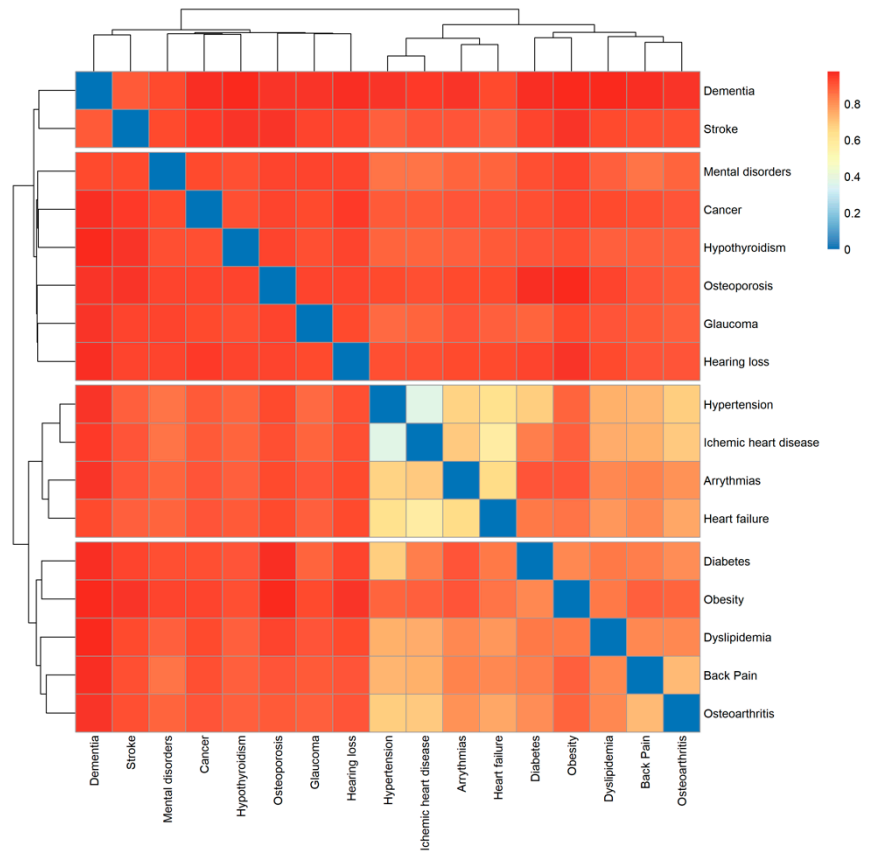

**Figure S4.** Multimorbidity clusters (no COPD group–females).
